# Supplementary material for: Identification of biomarker microRNAs for predicting the response of colorectal cancer to neoadjuvant chemoradiotherapy based on microRNA regulatory network
Source: PubMed Central journal article supplement (PMC5356795; doi:10.18632/oncotarget.13659), 2016-11-26
Supplement: oncotarget-08-2233-s001.pdf [file oncotarget-08-2233-s001.pdf]

## Identification of biomarker microRNAs for predicting the response of colorectal cancer to neoadjuvant chemoradiotherapy based on microRNA regulatory network

### Supplementary Materials

**Supplementary Table S1: The top 10 significantly enriched gene ontology (GO) terms by targets of reported *up-regulated* CRC chemoradiotherapy associated miRNAs**

| GO terms                                                              | Number of enriched genes | P-value  |
|-----------------------------------------------------------------------|--------------------------|----------|
| <b>Cellular component</b>                                             |                          |          |
| <b>0031974~membrane-enclosed lumen</b>                                | 323                      | 2.38E-23 |
| <b>0031981~nuclear lumen</b>                                          | 267                      | 1.50E-22 |
| <b>0043233~organelle lumen</b>                                        | 313                      | 1.06E-21 |
| <b>0005654~nucleoplasm</b>                                            | 185                      | 1.27E-21 |
| <b>0070013~intracellular organelle lumen</b>                          | 307                      | 1.73E-21 |
| <b>0044451~nucleoplasm part</b>                                       | 120                      | 6.32E-15 |
| 0043232~intracellular non-membrane-bounded organelle                  | 382                      | 2.02E-14 |
| 0043228~non-membrane-bounded organelle                                | 382                      | 2.02E-14 |
| <b>0005829~cytosol</b>                                                | 217                      | 4.22E-12 |
| 0012505~endomembrane system                                           | 140                      | 1.06E-10 |
| <b>Biological process</b>                                             |                          |          |
| <b>0010605~negative regulation of macromolecule metabolic process</b> | 173                      | 2.64E-21 |
| 0010629~negative regulation of gene expression                        | 125                      | 2.40E-17 |
| 0009890~negative regulation of biosynthetic process                   | 136                      | 4.12E-17 |
| 0031327~negative regulation of cellular biosynthetic process          | 132                      | 4.82E-16 |
| 0010558~negative regulation of macromolecule biosynthetic process     | 129                      | 8.21E-16 |
| 0010604~positive regulation of macromolecule metabolic process        | 176                      | 4.31E-15 |
| 0032268~regulation of cellular protein metabolic process              | 112                      | 7.14E-14 |
| 0010557~positive regulation of macromolecule biosynthetic process     | 138                      | 7.54E-13 |
| 0009891~positive regulation of biosynthetic process                   | 144                      | 9.80E-13 |
| 0031328~positive regulation of cellular biosynthetic process          | 142                      | 1.37E-12 |
| <b>Molecular function</b>                                             |                          |          |
| <b>0008134~transcription factor binding</b>                           | 117                      | 6.50E-14 |
| <b>0030528~transcription regulator activity</b>                       | 259                      | 5.14E-13 |
| 0003682~chromatin binding                                             | 48                       | 2.78E-11 |
| <b>0016563~transcription activator activity</b>                       | 87                       | 6.44E-9  |
| 0019899~enzyme binding                                                | 104                      | 7.34E-9  |
| <b>0016564~transcription repressor activity</b>                       | 71                       | 1.71E-8  |
| <b>0003712~transcription cofactor activity</b>                        | 75                       | 2.49E-7  |
| 0019838~growth factor binding                                         | 32                       | 2.92E-7  |
| 0042802~identical protein binding                                     | 114                      | 6.13E-7  |
| <b>0003700~transcription factor activity</b>                          | 159                      | 9.31E-7  |

Note: The GO terms in bold means they are also enriched by targets of down-regulated miRNAs (see Supplementary Table S2).

**Supplementary Table S2: The top 10 significantly enriched gene ontology (GO) terms by targets of reported *down-regulated* CRC chemoradiotherapy associated miRNAs**

| GO terms                                                              | Number of enriched genes | P-value  |
|-----------------------------------------------------------------------|--------------------------|----------|
| <b>Cellular component</b>                                             |                          |          |
| <b>0005654~nucleoplasm</b>                                            | 147                      | 2.85E-19 |
| <b>0031981~nuclear lumen</b>                                          | 204                      | 5.42E-18 |
| <b>0031974~membrane-enclosed lumen</b>                                | 244                      | 6.70E-18 |
| <b>0070013~intracellular organelle lumen</b>                          | 236                      | 9.50E-18 |
| <b>0043233~organelle lumen</b>                                        | 239                      | 1.91E-17 |
| <b>0005829~cytosol</b>                                                | 170                      | 5.07E-11 |
| <b>0044451~nucleoplasm part</b>                                       | 89                       | 9.71E-11 |
| 0005667~transcription factor complex                                  | 42                       | 3.90E-8  |
| 0005794~Golgi apparatus                                               | 113                      | 8.38E-8  |
| 0000267~cell fraction                                                 | 133                      | 1.18E-7  |
| <b>Biological process</b>                                             |                          |          |
| 0006793~phosphorus metabolic process                                  | 155                      | 3.06E-15 |
| 0006796~phosphate metabolic process                                   | 155                      | 3.06E-15 |
| 0042127~regulation of cell proliferation                              | 133                      | 4.23E-15 |
| 0016265~death                                                         | 122                      | 8.65E-14 |
| 0042981~regulation of apoptosis                                       | 131                      | 1.19E-13 |
| <b>0010605~negative regulation of macromolecule metabolic process</b> | 122                      | 2.33E-13 |
| 0043067~regulation of programmed cell death                           | 131                      | 2.54E-13 |
| 0008219~cell death                                                    | 120                      | 2.82E-13 |
| 0010941~regulation of cell death                                      | 131                      | 3.33E-13 |
| 0012501~programmed cell death                                         | 106                      | 7.36E-13 |
| <b>Molecular function</b>                                             |                          |          |
| <b>0030528~transcription regulator activity</b>                       | 199                      | 1.61E-11 |
| <b>0008134~transcription factor binding</b>                           | 86                       | 4.91E-10 |
| 0004672~protein kinase activity                                       | 93                       | 9.09E-9  |
| <b>0003700~transcription factor activity</b>                          | 128                      | 1.67E-7  |
| <b>0016563~transcription activator activity</b>                       | 66                       | 3.06E-7  |
| 0004674~protein serine/threonine kinase activity                      | 68                       | 3.91E-7  |
| <b>0016564~transcription repressor activity</b>                       | 54                       | 6.65E-7  |
| <b>0003712~transcription cofactor activity</b>                        | 59                       | 1.04E-6  |
| 0004721~phosphoprotein phosphatase activity                           | 33                       | 5.25E-6  |
| 0019904~protein domain specific binding                               | 53                       | 6.18E-6  |

Note: The GO terms in bold means they are also enriched by targets of up-regulated miRNAs (see Supplementary Table S1).

**Supplementary Table S3: The miRNA-mRNA pairs in CRC specific miRNA-mRNA network.**  
See Supplementary\_Table\_S3

**Supplementary Table S4: The significantly enriched ( $p$ -value < 0.01) KEGG pathways by targets of identified miRNA biomarkers**

| No. | Pathway term                                                    | P-value  |
|-----|-----------------------------------------------------------------|----------|
| 1   | hsa04520:Adherens junction                                      | 2.30E-04 |
| 2   | hsa05215:Prostate cancer                                        | 2.47E-04 |
| 3   | hsa05213:Endometrial cancer                                     | 6.39E-04 |
| 4   | hsa05214:Glioma                                                 | 6.59E-04 |
| 5   | hsa05200:Pathways in cancer                                     | 7.09E-04 |
| 6   | hsa05220:Chronic myeloid leukemia                               | 7.14E-04 |
| 7   | hsa05223:Non-small cell lung cancer                             | 8.50E-04 |
| 8   | hsa05218:Melanoma                                               | 1.71E-03 |
| 9   | hsa04114:Oocyte meiosis                                         | 1.92E-03 |
| 10  | hsa04722:Neurotrophin signaling pathway                         | 2.02E-03 |
| 11  | hsa04110:Cell cycle                                             | 5.90E-03 |
| 12  | hsa05210:Colorectal cancer                                      | 5.95E-03 |
| 13  | hsa05212:Pancreatic cancer                                      | 6.48E-03 |
| 14  | hsa04914:Progesterone-mediated oocyte maturation                | 7.02E-03 |
| 15  | hsa04010:MAPK signaling pathway                                 | 7.37E-03 |
| 16  | hsa04150:mTOR signaling pathway                                 | 1.06E-02 |
| 17  | hsa05216:Thyroid cancer                                         | 1.07E-02 |
| 18  | hsa04910:Insulin signaling pathway                              | 1.11E-02 |
| 19  | hsa04360:Axon guidance                                          | 1.85E-02 |
| 20  | hsa05221:Acute myeloid leukemia                                 | 1.88E-02 |
| 21  | hsa04530:Tight junction                                         | 2.43E-02 |
| 22  | hsa04310:Wnt signaling pathway                                  | 2.60E-02 |
| 23  | hsa05412:Arrhythmogenic right ventricular cardiomyopathy (ARVC) | 2.64E-02 |
| 24  | hsa04510:Focal adhesion                                         | 2.79E-02 |
| 25  | hsa04720:Long-term potentiation                                 | 4.08E-02 |
| 26  | hsa05222:Small cell lung cancer                                 | 4.43E-02 |
| 27  | hsa05211:Renal cell carcinoma                                   | 4.66E-02 |
| 28  | hsa04810:Regulation of actin cytoskeleton                       | 4.78E-02 |

**Supplementary Table S5: The top 40 significantly enriched IPA pathways (*P*-value < 0.01) enriched by targets of identified miRNA biomarkers**

| No. | Pathway term                                                          | <i>P</i> -value |
|-----|-----------------------------------------------------------------------|-----------------|
| 1   | Sertoli Cell-Sertoli Cell Junction Signaling                          | 1.48E-07        |
| 2   | p53 Signaling                                                         | 1.62E-07        |
| 3   | Glioma Signaling                                                      | 1.62E-07        |
| 4   | Hereditary Breast Cancer Signaling                                    | 3.24E-07        |
| 5   | NGF Signaling                                                         | 5.62E-07        |
| 6   | Regulation of the Epithelial-Mesenchymal Transition Pathway           | 1.07E-06        |
| 7   | ERK/MAPK Signaling                                                    | 1.38E-06        |
| 8   | Non-Small Cell Lung Cancer Signaling                                  | 1.48E-06        |
| 9   | Germ Cell-Sertoli Cell Junction Signaling                             | 1.91E-06        |
| 10  | Neurotrophin/TRK Signaling                                            | 2.09E-06        |
| 11  | Acute Myeloid Leukemia Signaling                                      | 2.14E-06        |
| 12  | VEGF Signaling                                                        | 2.29E-06        |
| 13  | Chronic Myeloid Leukemia Signaling                                    | 2.63E-06        |
| 14  | Small Cell Lung Cancer Signaling                                      | 3.89E-06        |
| 15  | Telomerase Signaling                                                  | 5.50E-06        |
| 16  | GM-CSF Signaling                                                      | 6.03E-06        |
| 17  | Molecular Mechanisms of Cancer                                        | 6.76E-06        |
| 18  | Breast Cancer Regulation by Stathmin1                                 | 7.24E-06        |
| 19  | Epithelial Adherens Junction Signaling                                | 8.51E-06        |
| 20  | Melanoma Signaling                                                    | 8.51E-06        |
| 21  | NRF2-mediated Oxidative Stress Response                               | 1.07E-05        |
| 22  | Production of Nitric Oxide and Reactive Oxygen Species in Macrophages | 1.07E-05        |
| 23  | Hepatic Fibrosis / Hepatic Stellate Cell Activation                   | 1.38E-05        |
| 24  | Ceramide Signaling                                                    | 1.41E-05        |
| 25  | Prostate Cancer Signaling                                             | 1.82E-05        |
| 26  | Myc Mediated Apoptosis Signaling                                      | 2.09E-05        |
| 27  | IGF-1 Signaling                                                       | 2.14E-05        |
| 28  | Melanocyte Development and Pigmentation Signaling                     | 2.34E-05        |
| 29  | Ephrin Receptor Signaling                                             | 2.40E-05        |
| 30  | Axonal Guidance Signaling                                             | 3.02E-05        |
| 31  | FAK Signaling                                                         | 3.31E-05        |
| 32  | Glioblastoma Multiforme Signaling                                     | 3.31E-05        |
| 33  | FLT3 Signaling in Hematopoietic Progenitor Cells                      | 3.47E-05        |
| 34  | Ovarian Cancer Signaling                                              | 3.47E-05        |
| 35  | 14-3-3-mediated Signaling                                             | 3.89E-05        |
| 36  | Actin Cytoskeleton Signaling                                          | 4.37E-05        |
| 37  | Rac Signaling                                                         | 4.57E-05        |
| 38  | Role of p14/p19ARF in Tumor Suppression                               | 4.90E-05        |
| 39  | Endometrial Cancer Signaling                                          | 5.25E-05        |
| 40  | Aldosterone Signaling in Epithelial Cells                             | 5.50E-05        |

**Supplementary Table S6: The details of top 15 significantly enriched KEGG pathways**

| Pathway term                                     | P-value   | Gene count | Enriched genes                                                                                                                                                                                    |
|--------------------------------------------------|-----------|------------|---------------------------------------------------------------------------------------------------------------------------------------------------------------------------------------------------|
| hsa04520:Adherens junction                       | 2.30 E-04 | 13         | CSNK2A2,TJP1,EP300,PVRL1,FYN,PVRL3,MAPK3,RHOA,LEF1,SNAI2,CTNNA1,TCF7L1, CTNNA3                                                                                                                    |
| hsa05215:Prostate cancer                         | 2.47 E-04 | 14         | FGFR2,MAP2K1,PIK3CD,LEF1,IGF2,RB1,TCF7L1,EP300,BCL2,ARAF,MAPK3,PDGFD,PIK3R1, AKT2                                                                                                                 |
| hsa05213:Endometrial cancer                      | 6.39 E-04 | 10         | MAP2K1,ARAF,MAPK3,PIK3CD,LEF1,CTNNA1,TCF7L1,CTNNA3, PIK3R1, AKT2                                                                                                                                  |
| hsa05214:Glioma                                  | 6.59E-04  | 11         | MAP2K1,CAMK2G,ARAF,MAPK3,PIK3CD,CDK6,SHC1,RB1,CDK4,PIK3R1, AKT2                                                                                                                                   |
| hsa05200:Pathways in cancer                      | 7.09 E-04 | 30         | FGFR2,TFG,BCL2L1, TCF7L1, TPM3, MAX, BCL2, RHOA, CSF3R, FAS, FGF1, CSF2RA, PIK3R1, AKT2, DVL3, MAP2K1, PIK3CD, LEF1, CDK6, RB1, CDK4, CTNNA1, STK4, CTNNA3, EP300, HDAC1, BAX, ARAF, MAPK3, WNT7A |
| hsa05220:Chronic myeloid leukemia                | 7.14 E-04 | 12         | MAP2K1, HDAC1, ARAF, MAPK3, PIK3CD, CDK6, SHC1, RB1, BCL2L1, CDK4, PIK3R1, AKT2                                                                                                                   |
| hsa05223:Non-small cell lung cancer              | 8.50 E-04 | 10         | MAP2K1,ARAF, MAPK3, PIK3CD, CDK6, RB1, CDK4, STK4, PIK3R1, AKT2                                                                                                                                   |
| hsa05218:Melanoma                                | 1.71E-03  | 11         | MAP2K1, ARAF, MAPK3, PIK3CD, CDK6, RB1, PDGFD, CDK4, FGF1, PIK3R1, AKT2                                                                                                                           |
| hsa04114:Oocyte meiosis                          | 1.92 E-03 | 14         | PPP2R1A, PPP2R5B, MAP2K1, CAMK2G, IGF2, CDC27, PPP1CA, RPS6KA3, RPS6KA1, PLK1, MAPK3, PPP2CB, YWHAQ, SMC1A                                                                                        |
| hsa04722:Neurotrophin signaling pathway          | 2.02 E-03 | 15         | MAP2K1, CAMK2G, PIK3CD, NTRK3, RPS6KA3, RPS6KA1, BAX, BCL2, MAP3K1, MAPK3, YWHAQ, RHOA, SHC1, PIK3R1, AKT2                                                                                        |
| hsa04110:Cell cycle                              | 5.90 E-03 | 14         | EP300,CDC14A,HDAC1,PLK1,YWHAQ, PCNA, CDK6, RB1, CDK4, SMC1A, CDC27, STAG2, BUB3, TFDP1                                                                                                            |
| hsa05210:Colorectal cancer                       | 5.9 E-03  | 11         | DVL3, MAP2K1, BCL2, BAX, ARAF, MAPK3, PIK3CD, LEF1, TCF7L1, PIK3R1, AKT2                                                                                                                          |
| hsa05212:Pancreatic cancer                       | 6.48 E-03 | 10         | MAP2K1,ARAF,MAPK3,PIK3CD,CDK6,RB1,BCL2L1,CDK4, PIK3R1,AKT2                                                                                                                                        |
| hsa04914:Progesterone-mediated oocyte maturation | 7.02E-03  | 11         | RPS6KA3, RPS6KA1, MAP2K1, PLK1, ARAF, MAPK3, PIK3CD, IGF2, CDC27, PIK3R1, AKT2                                                                                                                    |
| hsa04010:MAPK signaling pathway                  | 7.37 E-03 | 23         | FGFR2,CACNA2D1,MAP2K1,TAOK3,CACNB1, MAPKAPK3, NR4A1, STK4, MAX, RPS6KA3, MAP3K4, RPS6KA1, PAK2, MAP3K2, MAP3K1, MAPK3, CACNA1G, RRAS, FAS, STMN1, FGF1, PPP5C, AKT2                               |

**Supplementary Table S7: The details of top 15 significantly enriched IPA pathways**

| Pathway term                                                | P-value  | Gene count | Enriched genes                                                                                                                               |
|-------------------------------------------------------------|----------|------------|----------------------------------------------------------------------------------------------------------------------------------------------|
| Sertoli Cell-Sertoli Cell Junction Signaling                | 1.48E-07 | 22         | NOS1,SPTBN1,SPTBN2,EPN1,AKT2,RRAS,TJP1,TUBG1,PVRL3,MAP3K1,JAM2,CTNNA1,MAP3K4,TUBB,ACTA2,MAPK3,SPTB,PRKAG2,PVRL1,CLINT1,MAP2K1,MAP3K2         |
| p53 Signaling                                               | 1.62E-07 | 16         | AKT2,SNAI2,PIK3R1,PLAGL1,HDAC1,PIK3C2G,CDK4,BAX,FAS,BCL2,EP300,RB1,BCL2L1,PCNA,PIK3CD,HIPK2                                                  |
| Glioma Signaling                                            | 1.62E-07 | 16         | AKT2,TFDP1,RRAS,PIK3R1,PIK3C2G,CDK4,CDK6,IDH1,SHC1,RB1,IGF2,MAPK3,PIK3CD,PDGFD,MAP2K1,CAMK2G                                                 |
| Hereditary Breast Cancer Signaling                          | 3.24E-07 | 18         | AKT2,ARID1A,DPF1,RRAS,PIK3R1,TUBG1,HDAC1,PIK3C2G,CDK6,CDK4,SMARCA4,EP300,HDAC6,RB1,SMARCA2,H2AFX,PIK3CD,RFC3                                 |
| NGF Signaling                                               | 5.62E-07 | 16         | AKT2,RRAS,PIK3R1,MAP3K1,RPS6KA3,PIK3C2G,BAX,MAP3K4,EP300,SHC1,RHOA,MAPK3,PIK3CD,RPS6KA1,MAP2K1,MAP3K2                                        |
| Regulation of the Epithelial-Mesenchymal Transition Pathway | 1.07E-06 | 21         | AKT2,SNAI2,RRAS,PIK3R1,PIK3C2G,FGFR2,BCL9,TCF7L1,FGF1,PYGO2,WNT7A,ARAF,APH1A,MAPK3,RHOA,LEF1,DVL3,PIK3CD,PDGFD,MAP2K1,HMGA2                  |
| ERK/MAPK Signaling                                          | 1.38E-06 | 21         | MYCN,FYN,RRAS,PPP1R3C,PIK3R1,PPP2R5B,PIK3C2G,EP300,YWHAQ,PPP2CB,SHC1,PPP2R1A,H3F3A/H3F3B,ARAF,MAPK3,PAK2,PRKAG2,PIK3CD,RPS6KA1,PPP1CA,MAP2K1 |
| Non-Small Cell Lung Cancer Signaling                        | 1.48E-06 | 12         | STK4,RB1,AKT2,TFDP1,RRAS,PIK3R1,MAPK3,CDK6,CDK4,PIK3C2G,PIK3CD,MAP2K1                                                                        |
| Germ Cell-Sertoli Cell Junction Signaling                   | 1.91E-06 | 19         | EPN1,RRAS,TJP1,PIK3R1,TUBG1,PVRL3,MAP3K1,PIK3C2G,CTNNA1,MAP3K4,TUBB,ACTA2,MAPK3,RHOA,PAK2,PIK3CD,CLINT1,MAP2K1,MAP3K2                        |
| Neurotrophin/TRK Signaling                                  | 2.09E-06 | 12         | SHC1,SPRY1,RRAS,NTRK3,SPRY2,PIK3R1,MAPK3,PIK3C2G,PIK3CD,RPS6KA1,MAP2K1,EP300                                                                 |
| Acute Myeloid Leukemia Signaling                            | 2.14E-06 | 13         | CSF3R,AKT2,ARAF,CSF2RA,RRAS,MAPK3,PIK3R1,PIK3C2G,LEF1,PIK3CD,TCF7L1,MAP2K1,IDH1                                                              |
| VEGF Signaling                                              | 2.29E-06 | 14         | SH2D2A,SHC1,BCL2L1,AKT2,ACTA2,RRAS,PIK3R1,MAPK3,PIK3C2G,EIF2B3,PIK3CD,KDR,MAP2K1,BCL2                                                        |
| Chronic Myeloid Leukemia Signaling                          | 2.63E-06 | 14         | HDAC6,BCL2L1,RB1,AKT2,TFDP1,RRAS,PIK3R1,MAPK3,HDAC1,CDK6,CDK4,PIK3C2G,PIK3CD,MAP2K1                                                          |
| Small Cell Lung Cancer Signaling                            | 3.89E-06 | 12         | NOS1,BCL2L1,RB1,AKT2,MAX,TFDP1,PIK3R1,CDK6,CDK4,PIK3C2G,PIK3CD,BCL2                                                                          |
| Telomerase Signaling                                        | 5.50E-06 | 14         | HDAC6,RB1,SHC1,PPP2CB,PPP2R1A,AKT2,RRAS,MAPK3,PIK3R1,HDAC1,PPP2R5B,PIK3C2G,PIK3CD,MAP2K1                                                     |

**Supplementary Table S8: The statistical significance (*p*-value) of identified miRNA biomarkers between HCT116 and HT-29 group**

| miRNA ID    | <i>p</i> -value |
|-------------|-----------------|
| miR-198     | 0.007           |
| miR-765     | 0.002           |
| miR-671-5p  | 0.7551          |
| miR-630     | 0.0086          |
| miR-371-5p  | 0.000024        |
| miR-575     | 0.00062         |
| miR-202     | 0.0139          |
| miR-483-5p  | 0.3332          |
| miR-513a-5p | 0.00219         |

Note: The statistical significance (*p*-value) was calculated using the Student's *t*-test.

**Supplementary Table S9: Fold-changes of CXCR7 and PSMA6 expression between responders and non-responders to preoperative radiotherapy**

| Gene symbol | Treatment | Control  | Fold-change |
|-------------|-----------|----------|-------------|
| CXCR7       | GSM79068  | GSM79084 | 16.35       |
|             | GSM79068  | GSM79098 | 13.60       |
|             | GSM79102  | GSM79084 | 16.51       |
|             | GSM79102  | GSM79098 | 13.70       |
|             | GSM79071  | GSM79084 | 8.11        |
|             | GSM79071  | GSM79098 | 6.73        |
|             | GSM79103  | GSM79100 | 8.83        |
|             | GSM79103  | GSM79111 | 8.36        |
|             | GSM79113  | GSM79100 | 4.38        |
|             | GSM79113  | GSM79111 | 4.15        |
| PSMA6       | GSM79113  | GSM79111 | 2.00        |
|             | GSM79074  | GSM79112 | 2.18        |
|             | GSM79069  | GSM79105 | 2.40        |
|             | GSM79069  | GSM79082 | 2.54        |
|             | GSM79069  | GSM79084 | 2.26        |
|             | GSM79070  | GSM79105 | 2.62        |
|             | GSM79070  | GSM79082 | 2.67        |
|             | GSM79070  | GSM79084 | 2.37        |
|             | GSM79071  | GSM79080 | 2.06        |
|             | GSM79102  | GSM79080 | 2.05        |

Note: Samples were extracted from GSE3493, “Treatment” and “Control” represent responders and non-responders to preoperative radiotherapy, respectively, Fold-change = Treatment/Control.

**Supplementary Table S10: Summary of miRNA expression datasets used in this study**

| Information              | miRNA dataset    |
|--------------------------|------------------|
| GEO Accession            | GSE29298         |
| Patients                 | 38               |
| Males                    | 25               |
| Females                  | 13               |
| Good responders          | 9                |
| Less responding patients | 29               |
| Age                      | 64.4 (42.7–79.3) |
| PMID                     | 22172905         |
| Tissue                   | fresh biopsies   |



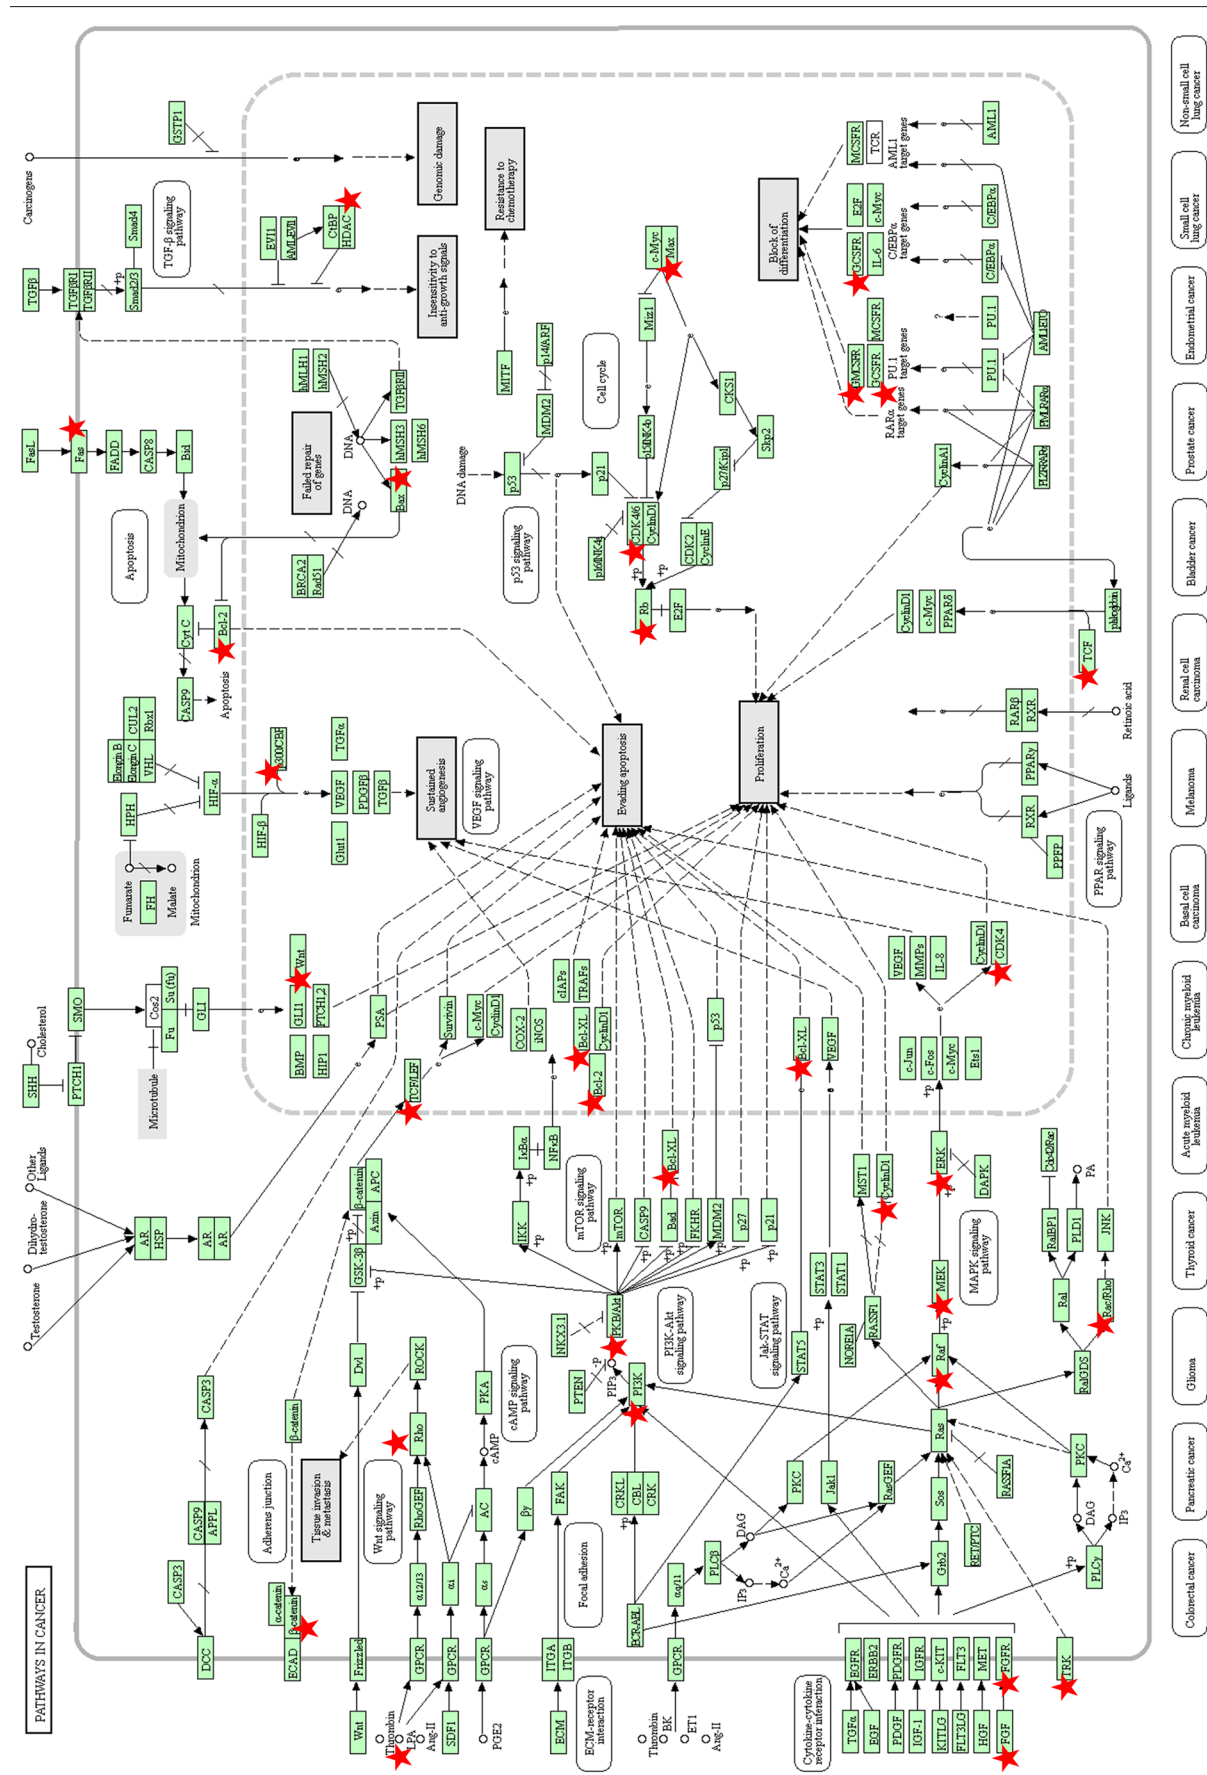

**Supplementary Figure S1: Pathways in cancer (from KEGG).** This pathway was significantly enriched in the KEGG analysis. Objects with pentagrams were the acting locus by mapped genes.



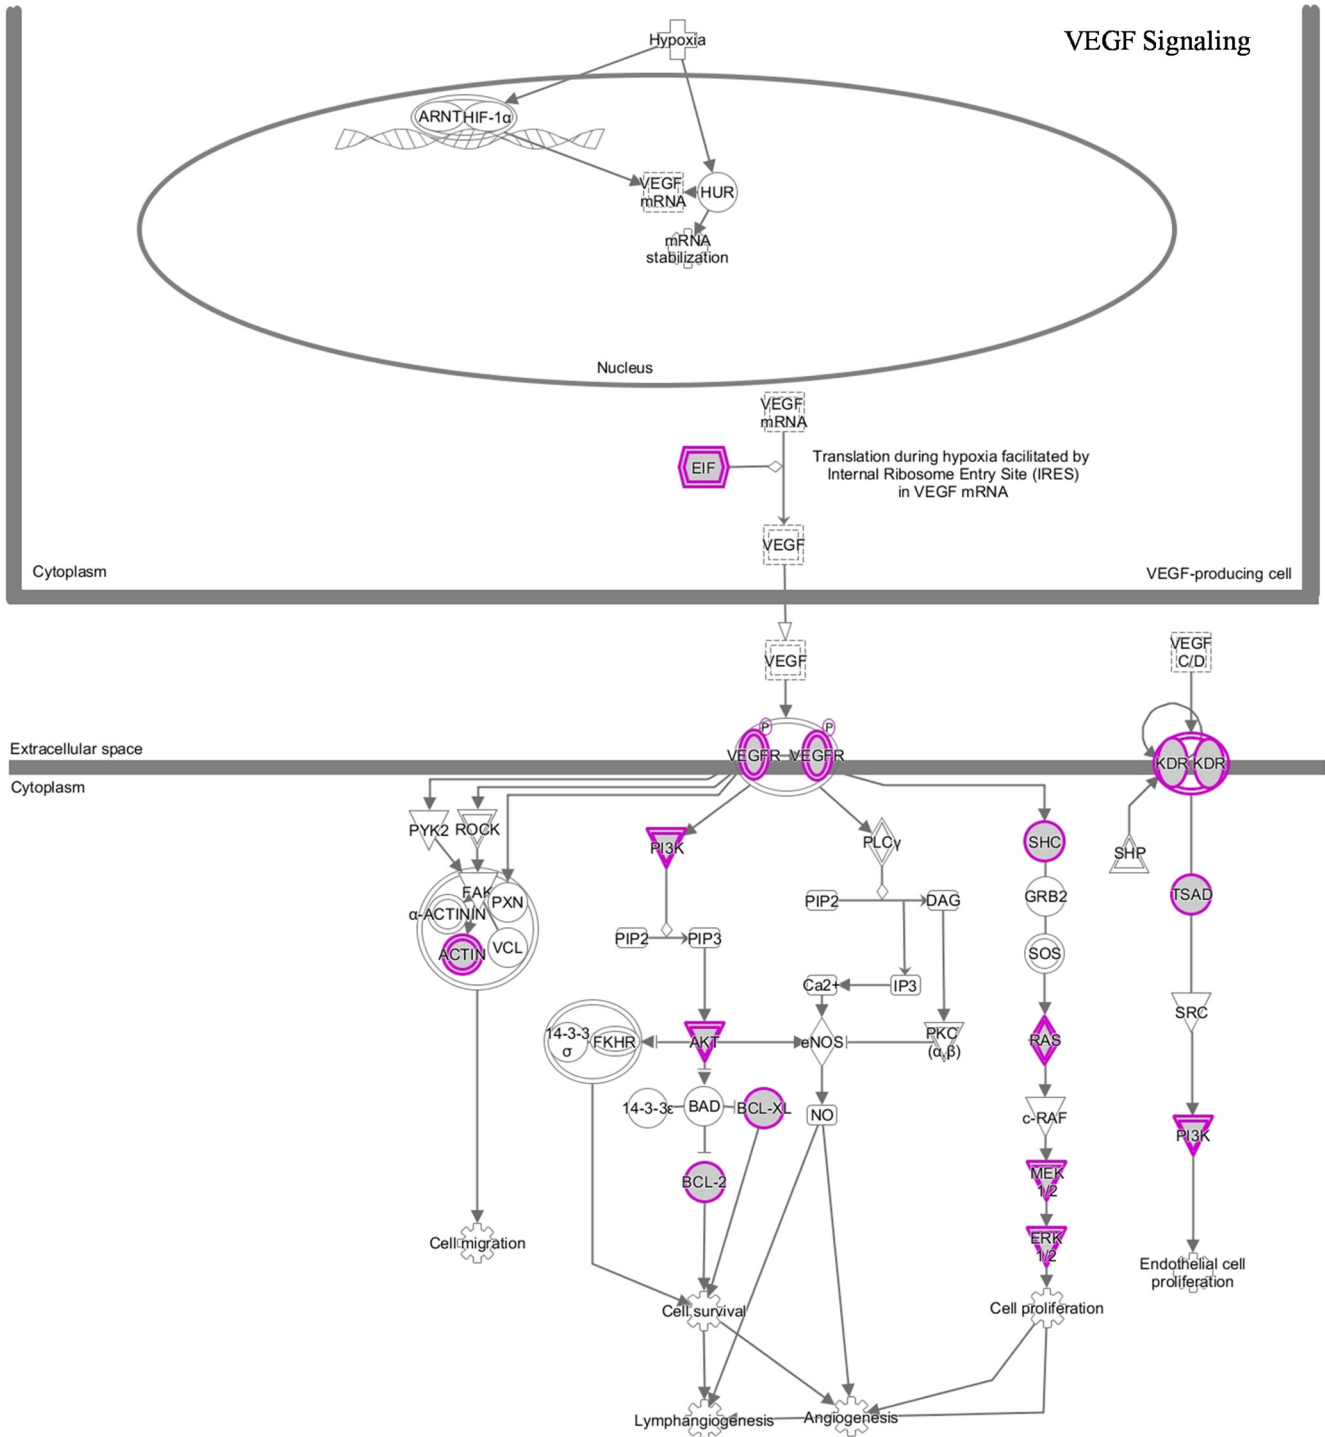

**Supplementary Figure S2: VEGF signaling pathway (from IPA).** This pathway was significantly enriched in the IPA analysis. Objects with purple circles are the acting locus by mapped genes.

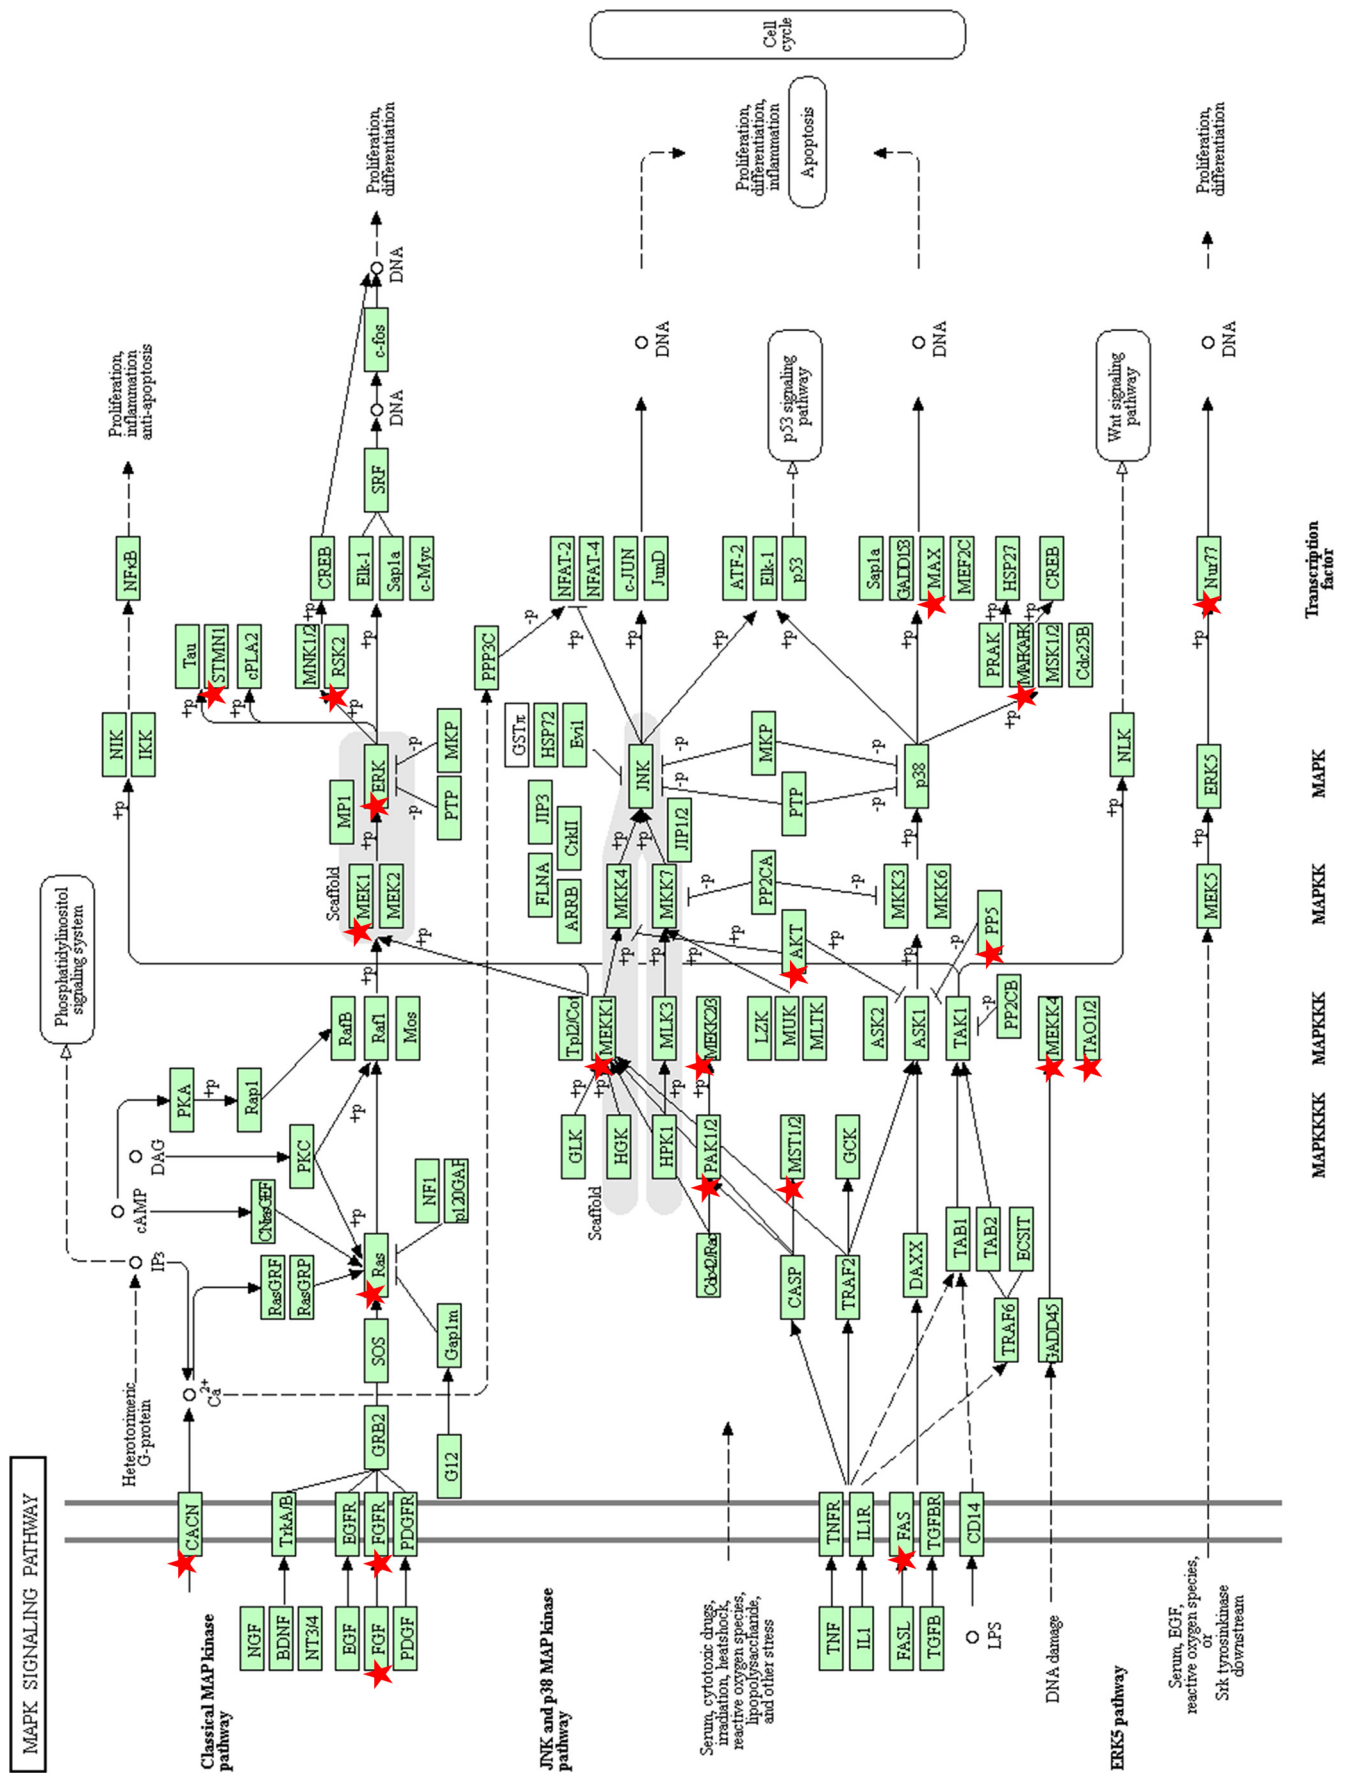

**Supplementary Figure S3: MAPK signaling pathway (from KEGG).** This pathway was significantly enriched in the KEGG analysis. Objects with pentagrams are the acting locus by mapped genes.
